# Existence of log-phase *Escherichia coli* persisters and lasting memory of a starvation pulse

Mikkel Skjoldan Svenningsen<sup>1</sup>, Sine Lo Svenningsen<sup>2</sup>, Michael Askvad Sørensen<sup>2,\*</sup>, Namiko Mitarai<sup>1,\*\*</sup>

---

## Abstract

The vast majority of a bacterial population is quickly killed when treated with a lethal concentration of antibiotics. The time scale of this killing is often comparable with the bacterial generation time before addition of antibiotics. Yet, a small subpopulation typically survives for an extended period. However, the long-term killing dynamics of bacterial cells has not been fully quantified even in well-controlled laboratory conditions. We constructed a week-long killing assay and followed the survival fraction of *Escherichia coli* K12 exposed to a high concentration of ciprofloxacin. We found that long-term survivors were formed during exponential growth, with some cells surviving at least 7 days. The long-term dynamics contained at least three timescales, which greatly enhances predictions of the population survival time compared to the biphasic extrapolation from the short term behavior. Furthermore, we observed a surprisingly long memory effect of a brief carbon starvation pulse, which was dependent on the (p)ppGpp synthase *relA*. Specifically, one hour of carbon starvation prior to antibiotics exposure increased the surviving fraction by nearly 100-fold even after 4 days of ciprofloxacin treatment.

**Keywords:** Bacterial persistence, Stress response, Growth physiology, Antimicrobials, (p)ppGpp

---

## 1. Introduction

Bacterial populations are quickly decimated during a typical antibiotics assault. Within a few generation times, the far majority of cells will be dead. However, it is typically recommended to use extended durations of treatment, ranging from several days to months, prolonging the exposure time of bacterial pathogens to the antibiotic [1]. The WHO is now considering the benefits of shortening the duration of antibiotics administration while still keeping the treatment effective, due to concerns of increasing antibiotic resistance occurring as a consequence of increased exposure [1]. To find the optimal treatment duration, one needs to understand the killing dynamics of bacteria when exposed to antibiotics, especially the bacterial cells surviving for longer times. The long-term survivors are typically referred to as persister cells, a subgroup of cells that survive antibiotics for an extended period compared to the average of the population, but have not acquired mutations that

make them resistant to the antibiotic [2, 3]. Most research on persister cells is done within the well-defined conditions of the laboratory, but despite these strongly simplified conditions, and more than seventy years of research, laboratory persisters are still far from understood [4, 5].

One pending question is whether and how much persisters form spontaneously during the exponential growth phase. Such persisters are called type-II [3] or spontaneous [4] persisters. It was repeatedly shown that stress-triggered (or type I) persisters are formed in high numbers during the stationary phase, but research on spontaneous persister formation during the exponential phase is sparse [4]. The research has mostly been confounded by a lack of careful attention to the presence of stationary phase cells carried over from the starter cultures, which artificially elevated the persister fraction of exponential cultures [5, 6, 4]. One carefully executed study showed that no *E. coli* persister cells were formed during fast exponential growth in rich medium [7], whereas other studies merely showed reduced levels during exponential growth [3, 5]. A benefit of analysing the exponential growth phase is the well-defined physiology of this state [8, 9]. This makes it possible to vary the growth physiology in a controlled manner, es-

---

\*correspondence: mas@bio.ku.dk

\*\*correspondence: mitarai@nbi.ku.dk

<sup>1</sup>The Niels Bohr Institute, University of Copenhagen

<sup>2</sup>The Department of Biology, University of Copenhagen

45 pecially by varying the growth rate through culturing  
 46 bacteria in media of different nutrient quality. It was  
 47 previously shown that the bacterial growth rate strongly  
 48 correlates with the death rate during the initial period of  
 49 killing with beta-lactams [10, 11, 12]. This poses the  
 50 additional questions of how the growth rate at the time  
 51 of antibiotics exposure affects the short- and long-term  
 52 killing dynamics.

53 The current standard for persister identification at the  
 54 population level is that the killing curve is at least biphasic,  
 55 where two time-scales are identified in the time-kill  
 56 curves [4]. Persisters are identified as the subpopulation  
 57 with a second, slower killing rate than the rapid death  
 58 rate of the primary population. If only two timescales  
 59 are present in the killing dynamics, the population survival  
 60 time can be extrapolated from the second slow  
 61 killing rate. Notably, the presence of more than two  
 62 phases has been demonstrated previously in a few studies  
 63 [3, 13, 14, 15]. These observations motivate the  
 64 importance of studying the long-term survival of the  
 65 antibiotics-tolerant subpopulation, which may not agree  
 66 with extrapolation from short-term survival. However,  
 67 most *in vitro* lab research on persisters of fast growing  
 68 bacteria as *E. coli* is carried out for three to five hours  
 69 [16, 7, 5], though some studies increase the exposure  
 70 time to 24–50 hours [2, 15, 17, 3]. Investigation of  
 71 long-term survival beyond the typical five-hour persister  
 72 assay might reveal new insights into bacterial killing  
 73 dynamics that are relevant for the week-long antibiotics  
 74 treatment of bacterial infections recommended by the  
 75 WHO [1].

76 Lastly, the molecular mechanism(s) of persister forma-  
 77 tion is still unknown [18, 12]. Many intracellular  
 78 components have been proposed to play a role  
 79 [19, 16, 20, 21, 22, 23], but so far no single mechanism  
 80 convincingly explains persister formation. In fact, bac-  
 81 terial persistence presents as a very complex and diverse  
 82 problem, where the survival fraction could be composed  
 83 of different subpopulations.

84 Despite the complexity of persistence, it has been es-  
 85 tablished that stationary phase cultures contain a greater  
 86 persister fraction than exponentially growing cultures  
 87 [5]. Stationary phase bacteria may refer to bacteria  
 88 in a multitude of different physiological states, but is  
 89 typically associated with starvation stress [24]. Fur-  
 90 thermore, the second messenger (p)ppGpp, which ac-  
 91 cumulates during starvation responses was frequently  
 92 shown to correlate positively with persistence formation  
 93 [25, 17, 26, 5, 21]. Hence, it is critical for persistence re-  
 94 search to understand the degree to which (p)ppGpp lev-  
 95 els affect persistence, and under which circumstances.

96 The present study investigates persistence in the bal-

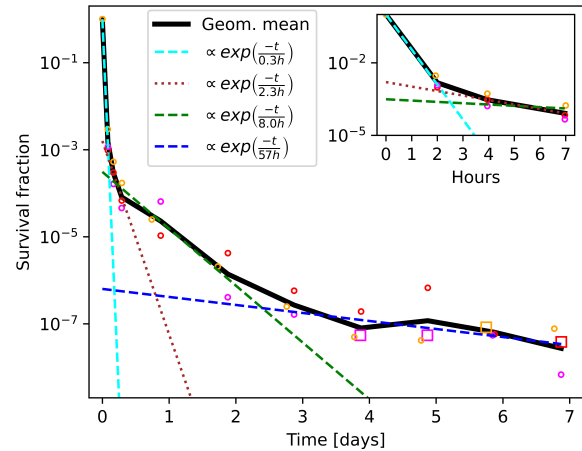

Figure 1: Killing dynamics of exponential phase *E. coli* persisters. Killing dynamics for exponential phase persisters. The bacteria were grown in glucose minimal medium. All three biological replicates are shown for each data point. The black line is the geometrical mean. Each separate phase of a triphasic fit are shown respectively as cyan, green and blue dashed lines. The second phase of a biphasic fit to the first seven hours is shown as a brown dotted line.

97 anced exponential growth phase where (p)ppGpp lev-  
 98 els are relatively low and correlate inversely with the  
 99 growth rate. It deals with whether *E. coli* forms spon-  
 100 taneous persisters in the exponential phase, their depen-  
 101 dence on the growth rate, how long they survive and  
 102 how their formation relates to (p)ppGpp levels. We fol-  
 103 lowed the long-term survival of *E. coli* K12 populations  
 104 exposed to a lethal concentration of ciprofloxacin for  
 105 one week. The growth rate of the *E. coli* population  
 106 at the time of antibiotics exposure was varied using growth  
 107 medium with either of two different carbon sources. In  
 108 addition, a knockout strain was constructed in the wild-  
 109 type background, removing the gene *relA* and, thus,  
 110 introducing a (p)ppGpp synthesis deficiency. Further-  
 111 more, we compared the killing dynamics with and with-  
 112 out a short carbon-starvation period immediately prior  
 113 to the killing assay. The starvation pulse had a consid-  
 114 erable influence on persister formation. This triggered  
 115 persistence had a very long memory effect on the sur-  
 116 vival of the population.

## 117 2. Results

### 118 Long-term persister assay of exponentially growing 119 cells

120 First, we investigated whether long-term persister  
 121 cells form during exponential growth in glucose mini-  
 122 mal medium. We treated balanced cultures of *E. coli*

123 K-12 with ciprofloxacin and monitored the killing dy-  
 124 namics for one week of antibiotics treatment. Balanced  
 125 growth was obtained by culturing the cells for more  
 126 than twenty doubling times in the target medium at 37  
 127 °C, keeping the cell density of the culture below an  
 128  $OD_{436}$  of 0.3 by repeated back-dilutions. Cultures were  
 129 then treated for a week with 10  $\mu\text{g}/\text{mL}$  ciprofloxacin  
 130 and their killing dynamics were monitored by repeated  
 131 platings of culture aliquots on antibiotics-free growth  
 132 medium (See methods for details).

133 *E. coli* persisters were formed during exponential bal-  
 134 anced growth in glucose minimal medium, as seen in  
 135 Fig. 1. There was a fast initial killing at a rate of about  
 136  $1/0.3$  ( $\text{h}^{-1}$ ), with a slower killing rate already after two  
 137 hours. When we fit a biphasic curve (summation of two  
 138 exponential functions) to the data up to 7 hours, the sec-  
 139 ond phase of killing is at a rate of about  $1/2.3$  ( $\text{h}^{-1}$ ),  
 140 shown by a brown line in the inset in Fig. 1. However,  
 141 for longer times, this fit significantly underestimates the  
 142 survival time of the bacterial population (Fig. 1). In  
 143 other words, there is an even slower phase of killing,  
 144 extending from seven hours to four days. Lastly, from  
 145 day five to day seven, the remaining cells were killed at  
 146 a very slow rate, however, this part of the data is less  
 147 reliable due to the small numbers of recovered colonies.

148 To identify the various phases in a quantitative man-  
 149 ner, the data was fitted with a sum of exponentials, and  
 150 the appropriate number of exponentials was chosen with  
 151 a  $\chi^2$  test (see Supplementary text S1 section 2). The  
 152 double exponential, which corresponds to the biphasic  
 153 killing dynamics, was rejected as a good fit by the test.  
 154 Instead, a fit using the triple exponential functions was  
 155 accepted. The best fit obtained was the first phase of  
 156 killing at a rate  $1/0.3$  ( $\text{h}^{-1}$ ) (a cyan dashed line), the sec-  
 157 ond phase of killing at a rate of  $1/8$  ( $\text{h}^{-1}$ ) (a green dashed  
 158 line), and the third phase of killing at a rate of  $1/57$  ( $\text{h}^{-1}$ )  
 159 (a blue dashed line). The long-term killing dynamics  
 160 thus had more than two time-scales, which is only ap-  
 161 parent after several days of measurement.

162 The exponential phase growth rate determines many  
 163 aspects of bacterial physiology, including the macro-  
 164 molecular composition [8, 27]. The growth rate at the  
 165 time of antibiotics exposure has previously been linked  
 166 to short-term survival of antibiotics [10, 11], and could  
 167 also affect long-term survival. For that reason, the long-  
 168 term killing assay was repeated with glycerol as the car-  
 169 bon source, which strongly affected the wildtype growth  
 170 rate. In glucose minimal medium, the wildtype dou-  
 171 bling time was  $50 \pm 1.4$  min, while it was  $106 \pm 3.0$  min  
 172 in glycerol minimal medium. This difference had an im-  
 173 pact on the initial phase of killing for up to seven hours,  
 174 showing slower killing and a higher survivor fraction in

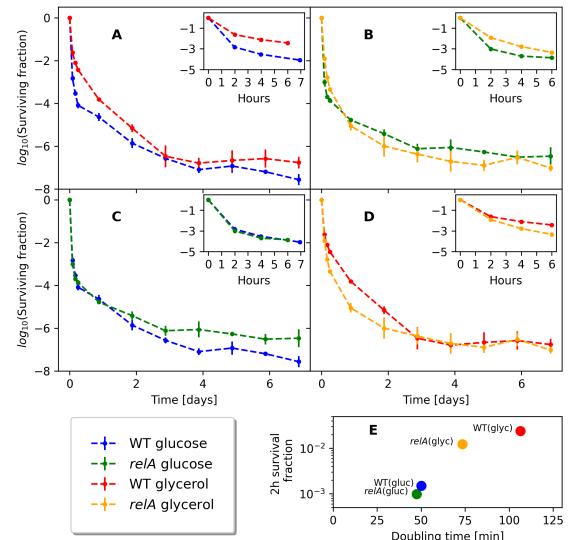

175 Figure 2: Killing dynamics in different medium with and without  
 176 the *relA* gene. Each line represents three biological replicates. (A)  
 177 The wildtype killing dynamics in either glycerol or glucose  
 178 minimal medium. (B) The  $\Delta relA$  killing dynamics in either glycerol or glucose  
 179 minimal medium. (C) Killing dynamics in glucose minimal medium  
 180 for comparison between the wildtype and the  $\Delta relA$  strain. blackThere  
 181 was no statistically significant difference between the wildtype sur-  
 182 vivors and the  $\Delta relA$  strain survivors at any of the timepoints (Supple-  
 183 mentary text S1 section 2). (D) Killing dynamics in glycerol minimal  
 184 medium for comparison between the wildtype and the  $\Delta relA$  strain.  
 185 (E) Survival fraction after two hours of ciprofloxacin treatment com-  
 186 pared to the growth rate prior to antibiotics treatment.

175 glycerol (Fig. 2A inset).

176 However, the long-term killing curve in glycerol min-  
 177 imal medium was not merely a decelerated version of  
 178 the killing curve in glucose minimal medium. Though  
 179 significantly more cells survive in glycerol than in glu-  
 180 cose for up to a day (Fig. 2A), the survival curve in  
 181 glycerol medium had a steeper slope than in glucose  
 182 medium, resulting in comparable surviving fractions af-  
 183 ter 2 to 3 days. In fact, in two of the three biological  
 184 replicates of wildtype cultures grown in glycerol, al-  
 185 most no survivors were observed after 3 days of killing  
 186 (see Supplementary text S1 section 1), supporting fur-  
 187 ther that the survival in glycerol minimal medium is not  
 188 more than that in glucose minimal medium after 3 days.

189 Overall, the wildtype killing dynamics in glycerol  
 190 had more than two time scales, with a best fit of four  
 191 separate phases of killing (Supplementary text S1 sec-  
 192 tion 2).

### 193 *Deletion of relA affects the killing dynamics*

194 In glycerol minimal medium, the steady state  
195 (p)ppGpp level of the wildtype strain is higher than in  
196 glucose minimal medium [28]. Because the (p)ppGpp  
197 level has been frequently associated with persister for-  
198 mation, we next aimed at investigating the effect of  
199 the initial (p)ppGpp level on long-term survival. *E.*  
200 *coli* encodes the primary (p)ppGpp synthetase RelA  
201 and the secondary (p)ppGpp synthetase SpoT, the lat-  
202 ter of which is bifunctional as a (p)ppGpp hydrolase.  
203 The nutrient-dependent steady-state growth rates are  
204 inversely related to the concentrations of (p)ppGpp,  
205 both for *relA*<sup>+</sup> and *relA*<sup>-</sup> strains [28], and for many  
206 carbon sources, the growth rates and (p)ppGpp levels  
207 of *relA*<sup>+</sup>/*relA*<sup>-</sup> strain pairs are indistinguishable due to  
208 (p)ppGpp synthesis by SpoT. However, in low energy  
209 carbon sources like glycerol or acetate, SpoT produces  
210 insufficient (p)ppGpp to reduce the growth rate when  
211 RelA is missing, leading to an enhanced growth rate  
212 of the RelA mutant strain relative to the wildtype [28].  
213 We constructed a  $\Delta relA$  mutant to clarify the role of  
214 (p)ppGpp in the killing dynamics.

215 As expected, the difference between the growth rate  
216 in glucose and in glycerol minimal medium was smaller  
217 for the  $\Delta relA$  strain than the wildtype, with a doubling  
218 time of  $47 \pm 1.5$  min in glucose minimal medium and  
219  $74 \pm 1.6$  min in glycerol minimal medium. The survival  
220 after 2 hours is positively correlated with the doubling  
221 time (Fig. 2E), consistent with the previous observations  
222 that the initial killing rate decreases with the doubling  
223 time [11]. The short term (up to 4 hours) survival under  
224 antibiotics exposure was also correlated with the growth  
225 rate in the  $\Delta relA$  strain (Fig. 2 inset).

226 Like wildtype cells, the  $\Delta relA$  mutant formed long-  
227 term survivors in both glucose and glycerol minimal  
228 medium with more than two phases of killing (Fig. 2B,  
229 see Supplementary text S1 section 2 for statistical anal-  
230 ysis). In glucose, the two strains grew at similar rates,  
231 and the early killing dynamics of the  $\Delta relA$  mutant were  
232 very similar to that of the wildtype (Fig. 2C). In glyc-  
233 erol, the faster-growing  $\Delta relA$  mutant showed a signifi-  
234 cantly lower level of persisters than the wildtype in the  
235 initial phase of killing up to one day (Fig. 2D, see Sup-  
236 plementary text S1 section 2), indicating the importance  
237 of growth rate, or ppGpp level, for persister formation  
238 in this phase. Interestingly, the long-term survival of  
239 the  $\Delta relA$  mutant and wildtype were comparable at later  
240 times (after 3 days) in glycerol medium, and some-  
241 what higher than the wildtype strain in glucose medium.  
242 Thus, survival in the long term is not simply dependent  
243 on the population growth rate at the time of antibiotics  
244 exposure.

### 245 *A starvation pulse prior to the antibiotic application af-* 246 *fects the long-term persistence of wildtype cells in glu-* 247 *ucose minimal medium*

248 A sudden downshift of the carbon source is known  
249 to give a spike of the (p)ppGpp level in the wildtype  
250 strain just after the downshift, while the spike is signif-  
251 icantly lower in a RelA strain [29]. We then wondered  
252 if a short pulse of carbon source starvation to the expo-  
253 nentially growing cells prior to the killing assay would  
254 give a quantifiable difference in the long-term persis-  
255 tence between the wildtype strain and the  $\Delta relA$  strain.  
256 If the starvation pulse increases the persisters, it would  
257 be considered as triggered persistence, and the current  
258 study would allow us to quantify how long such trig-  
259 gered persisters last.

260 In order to test this, part of the cultures in balanced  
261 growth were filtered into growth medium without a car-  
262 bon source and starved for 1 hour, before the carbon  
263 source was replenished (Figure 3A). Figure 3B shows  
264 that the 1-hour starvation pulse resulted in a quick rise  
265 of the ppGpp level peaking at about 15 min after the  
266 downshift for the wildtype strain in glucose medium,  
267 while only a mild increase of the ppGpp level was seen  
268 in the  $\Delta relA$  strain. Antibiotics were added simultane-  
269 ously with the carbon source replenishment (Fig. 3A,  
270 see methods for details). Remarkably, the short car-  
271 bon starvation prior to the addition of antibiotics had  
272 long-term effects on the killing dynamics. This was  
273 especially visible for the wildtype strain grown in glu-  
274 cose minimal medium, where the brief starvation period  
275 reproducibly resulted in almost 100-fold more persis-  
276 ters for up to four days. The difference was abolished  
277 by removing *relA*, as seen in Fig. 4B; the  $\Delta relA$  strain  
278 only exhibited increased survival for the first six hours  
279 following starvation. As such, the long-term memory  
280 of the starvation pulse is seemingly a *relA*-dependent  
281 effect. However, the  $\Delta relA$  strain in the steady state  
282 growth in glucose had more long-term survivors than  
283 the wild-type strain, and the downshift brought the wild-  
284 type strain survival fraction to a level similar to the  
285  $\Delta relA$  strain.

286 The effect of the downshift was smaller in the glyc-  
287 erol medium (Fig. 4CD). In the wildtype strain, the av-  
288 erage persister level with downshift was higher up to  
289 4 days, but the statistical significance of the difference  
290 was confirmed only up to 7 hours due to the larger  
291 data scatter for later time points (Fig. 4C). The effect of  
292 downshift disappeared faster in the  $\Delta relA$  strain already  
293 after 2 days (Fig. 4D).

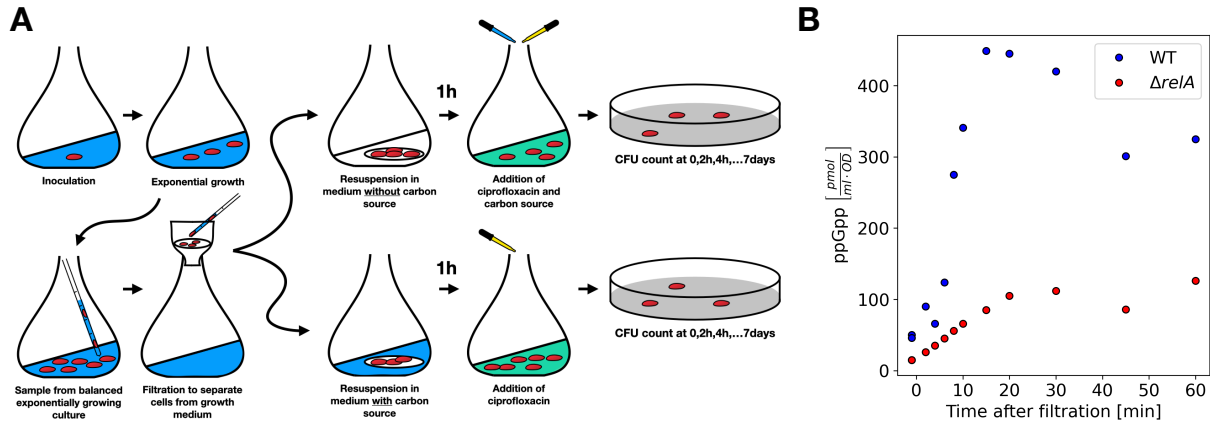

Figure 3: The experimental setup for the long-term persistence assay. (A) Cells were in balanced exponential growth prior to the killing assay. A part of the culture was filtered and then resuspended in medium with or without the carbon source, and incubated for 1 hour. After 1 hour, the ciprofloxacin was added to both of the samples, and at the same time the carbon source was added to the culture that has been starved for 1 hour. The first sample was taken just before the additions. After that, samples were taken at 2,4,6/7, 21+24- $n$  hours after the antibiotic addition for  $n \in [0; 6]$ . The samples were washed and plated on agar plates containing the target medium. (B) The 1-hour time course of ppGpp level for the culture grown in the glucose medium, filtered, and resuspended in fresh medium without carbon source. The time zero is the time of the resuspension. The wild type (blue circles) shows clear peak around 15 minutes after the resuspension.  $\Delta relA$  strain shows only mild increase of the ppGpp level. The phosphoImager scan of TLC plates used to quantify ppGpp levels is shown in Supplementary Fig. S7.

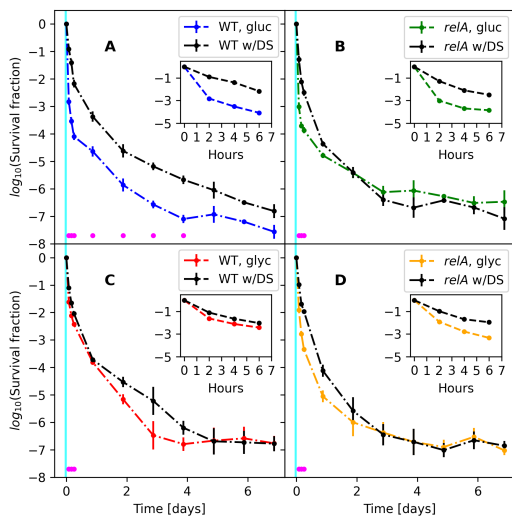

Figure 4: The effect of a short starvation-pulse on the survival dynamics. All strains and conditions are shown with and without the downshift. The black line is with the downshift, the colored line is without the downshift. The magenta dots represent statistically different datapoints as tested by an unequal variances two-sided t-test. The cyan interval illustrates the downshift period prior to the killing assay. (A) The wildtype in glucose. A downshift in glucose significantly enhances wildtype survival for four days and seems to be increased for up to all seven days. (B) The  $\Delta relA$  mutant in glucose. (C) The wildtype in glycerol. (D) The  $\Delta relA$  mutant in glycerol.

### 294 3. Discussion

295 We expanded the understanding of bacterial killing  
 296 dynamics with a long-term persister assay. The use  
 297 of minimal medium facilitated the formation of long-  
 298 term persisters during exponential growth, in contrast  
 299 to growth and killing in rich medium [7]. Spontaneous  
 300 persisters were observed during the exponential growth  
 301 phase, both in glucose and glycerol minimal medium,  
 302 and in some cases they survived at least one week. This  
 303 long-term survival does not require *relA*, although the  
 304 residual (p)ppGpp synthesized by SpoT is likely neces-  
 305 sary. In fact, there is an increase in long-term survival  
 306 of the  $\Delta relA$  mutant in glucose.

307 We have shown that a one-hour starvation pulse prior  
 308 to the addition of the antibiotic affects long-term sur-  
 309 vival. The finding that a short starvation pulse gives a  
 310 long-term effect is consistent with a previous study of  
 311 a temporal nitrogen downshift prior to antibiotics treat-  
 312 ment, which was shown to elevate the persister level at  
 313 24 hours in a *relA* dependent manner [30]. Also, a few  
 314 other studies have previously shown that triggered per-  
 315 sistence can be *relA* dependent [25, 21]. Our study  
 316 demonstrated that the memory can be remarkably long-  
 317 lasting, as one-hour carbon starvation gave an increase  
 318 in survival for at least 4 days in the wildtype strain  
 319 grown in glucose medium. The molecular mechanism  
 320 underlying this long-term memory is yet to be inves-

321 tigated, but in all likelihood it is linked to the abrupt 373  
322 RelA-mediated rise in (p)ppGpp upon starvation, since 374  
323 the starvation-pulse effect on long-term survival was 375  
324 abolished in the  $\Delta relA$  mutant. In further support of this 376  
325 hypothesis, there was no long-term effect when glycerol 377  
326 was used as the carbon source, which could be due 378  
327 to the high basal level of (p)ppGpp in glycerol relative 379  
328 to glucose minimal medium [8]. The sensitivity of the 380  
329 survival fraction to the rather short perturbation may be 381  
330 consistent with the idea that there is a threshold in some 382  
331 molecule concentration to determine if the cell becomes  
332 a persister or not [31, 32], since a small perturbation  
333 can have a major impact on the occurrence of rare expres-  
334 sion patterns that exceed an extreme threshold [33].  
335 This observation also alerts us that blacka small pertur-  
336 bation in the experimental procedure may strongly af-  
337 fect the result of persister assays.

338 This study shows that the long-term killing of *E. coli* 386  
339 in ciprofloxacin is not adequately described by biphasic 387  
340 dynamics. At least three phases of killing were 388  
341 present in the data. Thus, despite the emphasis on at  
342 least a biphasic behaviour to define persistence [4], a  
343 third, or even fourth, phase of killing occurs that may  
344 even be more clinically relevant. The presence of addi-  
345 tional phases also means that the population survival  
346 time will be underestimated by predictions from the  
347 biphasic killing assumption. Indeed, it is not sufficient  
348 to measure killing dynamics for only five hours and then  
349 extrapolate the population survival time from there.

350 The detailed molecular mechanism of the observed 396  
351 persistence is not the focus of the current study. Nev- 397  
352 ertheless, it is worth mentioning that ciprofloxacin has 398  
353 been reported to induce persistence via toxin activation 399  
354 through the SOS response in the killing dynamics up to 400  
355 6 hours [34]. The existence of more than two killing 401  
356 phases indicates that different mechanisms may play 402  
357 roles for longer-term persistence on top of the previ- 403  
358 ously studied ones. For the future study of the molecu- 404  
359 lar mechanisms of persistence, attention should be paid to 405  
360 which time scale of the survival the pathway affect. 406

361 The population growth rate was found to be posi- 407  
362 tively correlated with the killing rate in the initial phase. 408  
363 However, the correlation was diminished in the longer 409  
364 term survival, and lost in the third phase of killing. In 410  
365 shorter persister assays, a difference in growth rate, such 411  
366 as between different mutants, might strongly confound 412  
367 results when analyzing persistence fractions. These dif- 413  
368 ferences seem smaller and less relevant in later phases 414  
369 of killing. 415

370 This investigation of long-term killing dynamics has 416  
371 added to the concept of bacterial persistence as a com- 417  
372 plex phenomenon. During long-term antibiotics treat- 418

ment, different mechanisms could account for bacterial 373  
survival on different timescales (an hour, a day, a week), 374  
although the (p)ppGpp level at the time of initial expo- 375  
sure to the antibiotic seems to be important in all cases. 376  
As such, persistence seems to be a time-dependent phe- 377  
nomenon, where different survival mechanisms account 378  
for different bacterial life spans. The presence of sev- 379  
eral phases in the killing dynamics begs the question if 380  
a more extended concept should replace the simplified 381  
concept of bacterial persistence. 382

## 383 4. Methods and Materials

### 384 Strains

385 The strain MAS1081 (MG1655 *rph*<sup>+</sup> *gatC*<sup>+</sup> *glpR*<sup>+</sup>) 386  
was used as the wildtype [35]. The  $\Delta relA$ , MAS1191, 387  
is MAS1081 made  $\Delta relA251 :: Kan$  by P1 transduction 388  
from CF1651 [36] followed by selection on kanamycin.

### 389 Long-term killing assay

390 A single colony of the *E. coli* strain grown on an 391  
agar plate was incubated overnight in the target medium 392  
(MOPS minimal medium with either glucose or glycerol 393  
as the carbon source [37]. See the Supplementary 394  
text S1 section 1 for the recipe). This was done for each 395  
biological replicate. The overnight culture was diluted 396  
1 : 10<sup>7</sup> in 10 mL target medium in a 100 mL Erlenmeyer 397  
flask. The flask was continuously shaken at 160 RPM 398  
in a 37°C room. Hours later, the culture was diluted 399  
further, at least 1 : 10<sup>2</sup>, in 100 mL preheated medium 400  
in a 1L Erlenmeyer flask, reaching a total dilution of 401  
at least 1 : 10<sup>9</sup>. Once the OD<sub>436</sub> reached a detectable 402  
level of 0.01, at least 5 samples were measured at dif- 403  
ferent timepoints to establish a growth rate (supplemen- 404  
tary Fig. S4). The OD<sub>436</sub> was consistently kept below 405  
0.3. A part of the culture, typically around 20 mL, was 406  
filtered, and the cells on the filter were resuspended in 407  
40 mL of the target medium (w/o carbon source) in a 408  
300 mL Erlenmeyer flask. As such, both the control 409  
and the starved culture were exposed to filtration and 410  
resuspension. The medium volume never exceeded 14 411  
percent of the flask volume. The starvation was ver- 412  
ified by measuring OD<sub>436</sub>, to confirm either increase in 413  
biomass (control) or no growth (starving culture). See 414  
the Supplementary text S1 section 1 for confirmation 415  
of the downshift. After one hour of starvation, a sample 416  
was taken immediately before ciprofloxacin (10 µg/mL) 417  
was added along with the carbon source, that was re- 418  
plenished to end the downshift. Samples were taken at

419 times 2,4,6/7, 21+24·*n* hours for *n* ∈ [0; 6]. The sam- 468  
420 ples were put on ice for a few minutes and then cen- 469  
421 trifuged for ten minutes at 4°C at 10,000*g*. The super- 470  
422 natant was removed and the cell pellet was resuspended 471  
423 in room temperature MOPS buffer with no supplements. 472  
424 The sample was diluted appropriately, never more than 473  
425 1 : 100 per step, corresponding to 10 μL in 990 μL. 474  
426 The sample was plated with 200 μL per plate on mini- 475  
427 mal medium plates containing the target medium. The 476  
428 plates were kept at 37°C for at least one week and all 477  
429 colonies were counted. The whole experiment is illus- 478  
430 trated in figure 3. Detection limit of each experiment is 479  
431 presented in supplementary Fig. S6. 480

### 432 *Controls*

433 After each completed experiment (7 days), 200 μL 482  
434 of culture, still containing antibiotics, was spread on a 483  
435 plate with the target medium. This was left at 37°C for 484  
436 at least 7 days, and no growth confirmed the absence of 485  
437 a growing resistant culture in the flask. In addition, the 486  
438 activity of the antibiotics in the culture was tested after 487  
439 seven days by dropping 20 μL on a lawn of growing *E.* 488  
440 *coli*.

### 441 *Analysis of time-scales in the killing dynamics*

442 Time-scales in the killing dynamics were statistically 489  
443 identified by fitting a sum of exponential functions to 490  
444 the data. The model with the least number of param- 491  
445 eters, that could not significantly be rejected, was then 492  
446 chosen [38]. The functional form of the models was a 493  
447 sum of exponential functions. The number of exponen- 494  
448 tial functions in the sum corresponded to the number of 495  
449 time-scales. A biphasic killing curve would for exam-  
450 ple be well fitted by the sum of two exponentials. The  
451  $\chi^2$ -test for goodness of fit is used for identifying the ap-  
452 propriate model using the Minuit minimization software  
453 [39, 40] (see the Supplementary text S1 section 2 for  
454 specifics of the analysis).

### 455 *Statistical analysis*

456 All killing curves are based on three biological repli-  
457 cates. The mean is determined as the mean of the log-  
458 arithmic values, which corresponds to the geometric  
459 mean. This is done to get a more adequate mean-value  
460 representation in log-space. The uncertainties are also  
461 calculated as the standard deviations of the log trans-  
462 formed values. Whenever a datapoint had the value  
463 zero, which happened frequently, that value was re-  
464 placed with the detection limit, to get a sensible value  
465 in log-space. An unequal variance two-sided t-test was  
466 used to determine significant differences between two  
467 datapoints at the same timepoint ( $P < 0.05$ ).

### 468 *ppGpp measurements*

469 The measurements Were performed essentially as de-  
470 scribed in [41] and used in [42, 43, 44]. In short:  
471 Cultures were grown for two generations in the pres-  
472 ence of 75μCi/mL 32P-phosphate at a total phosphate  
473 concentration of 0.33 mM. At the time of starvation,  
474 cultures were filtered, washed in medium without glu-  
475 cose and phosphate and resuspended in medium with-  
476 out glucose but containing 32P at the same specific ac-  
477 tivity as during growth. These steps were performed at  
478 37°C and lasted less than 2 min. For determination of  
479 the nucleotide pools, 100 μL of culture was harvested  
480 into 20μL 2M formic acid at 0°C. After centrifugation  
481 the nucleotides in the supernatant were separated by  
482 chromatography on polyethyleneimine-cellulose plates.  
483 The activities of the individual spots were quantified  
484 by PhosphoImager scans (Typhoon Phosphor Imager  
485 FLA7000 (GE Healthcare)) of the plates. The specific  
486 activity of the signal was determined from a medium  
487 sample from the individual cultures spotted onto the  
488 same brand of plates.

### 489 *Acknowledgments*

MSS and NM thank S. Semsey for fruitful discus-  
490 sions. This work was supported by the Danish Na-  
491 tional Research Foundation (DNRF120), the Indepen-  
492 dent Research Fund Denmark (8049-00071B and 8021-  
493 00280B), and the Villum foundation (00028054). 494

### 495 *References*

- 496 [1] M. D. Pezzani, G. Be, P. Cattaneo, A. Zaffagnini, F. Gobbi,  
497 P. Rodari, Z. Bisoffi, E. Tacconelli, Evidence based review on  
498 optimal duration of antibiotic therapy for bacterial infections to  
499 support antimicrobial stewardship recommendations WHO Sec-  
500 retariat Nicola Magrini, Secretary of the Expert Committee on  
501 Selection and Use of Essential Medicines; In (2019) 1–28.
- 502 [2] J. W. Bigger, Treatment of Staphylococcal Infections With Peni-  
503 cillin By Intermittent Sterilisation, *The Lancet* 244 (1944) 497–  
504 500. doi:10.1016/S0140-6736(00)74210-3.
- 505 [3] N. Q. Balaban, J. Merrin, R. Chait, L. Kowalik, S. Leibler, Bac-  
506 terial Persistence as a Phenotypic Switch, *Science* 305 (2004)  
507 1622–1625. doi:10.1126/science.1099390.
- 508 [4] N. Q. Balaban, S. Helaine, A. Camilli, J. J. Collins, J.-M.  
509 Ghigo, W.-D. Hardt, A. Harms, M. Heinemann, Defini-  
510 tions and guidelines for research on antibiotic persistence,  
511 *Nature Reviews Microbiology* 17 (2019) 441–448. URL:  
512 <http://dx.doi.org/10.1038/s41579-019-0196-3>.  
513 doi:10.1038/s41579-019-0196-3.
- 514 [5] A. Harms, C. Fino, M. A. Sørensen, S. Semsey, K. Gerdes,  
515 Prophages and Growth Dynamics Confound Experimental Re-  
516 sults with Antibiotic-Tolerant Persister Cells, *mBio* 8 (2017)  
517 1–18. doi:10.1128/mBio.01964-17.

- [6] A. Brauner, O. Fridman, O. Gefen, N. Q. Balaban, Distinguishing between resistance, tolerance and persistence to antibiotic treatment, *Nature Reviews Microbiology* 14 (2016) 320–330. URL: <http://dx.doi.org/10.1038/nrmicro.2016.34>. doi:10.1038/nrmicro.2016.34.
- [7] I. Keren, N. Kaldalu, A. Spoering, Y. Wang, K. Lewis, Persister cells and tolerance to antimicrobials, *FEMS Microbiology Letters* 230 (2004) 13–18. doi:10.1016/S0378-1097(03)00856-5.
- [8] H. Bremer, P. P. Dennis, Modulation of Chemical Composition and Other Parameters of the Cell by Growth Rate, *Escherichia coli and Salmonella: cellular and molecular biology* 2 (1987) 1527–1542. doi:10.1046/j.1365-2486.2000.06017.x.
- [9] M. Scott, C. W. Gunderson, E. M. Mateescu, Z. Zhang, T. Hwa, Interdependence of Cell Growth and Gene Expression: Origins and Consequences, *Science* 330 (2010) 1099–1102. doi:<https://doi.org/10.1126/science.1192588>.
- [10] E. Tuomanen, R. Cozens, W. Tosch, O. Zak, A. Tomasz, The rate of killing of *Escherichia coli* by beta-lactam antibiotics is strictly proportional to the rate of bacterial growth., *Journal of general microbiology* 132 (1986) 1297–304. doi:10.1099/00221287-132-5-1297.
- [11] A. J. Lee, S. Wang, H. R. Meredith, B. Zhuang, Z. Dai, L. You, Robust, linear correlations between growth rates and  $\beta$ -lactam-mediated lysis rates (2018) 1–6. doi:10.1073/pnas.1719504115.
- [12] M. H. Pontes, E. A. Groisman, Slow growth determines non-heritable antibiotic resistance in *Salmonella enterica*, *Science Signaling* 12 (2019) 1–11. doi:10.1126/scisignal.aax3938.
- [13] E. M. Windels, Z. B. Meriem, T. Zahir, K. J. Verstrepen, P. Hersen, B. V. den Bergh, J. Michiels, Isolation of persisters enabled by  $\beta$ -lactam-induced filamentation reveals their single-cell awakening characteristics, *Communications Biology* (2019) 600700. URL: <https://www.biorxiv.org/content/10.1101/600700v1>. doi:10.1101/600700.
- [14] E. Simsek, M. Kim, Power-law tail in lag time distribution underlies bacterial persistence 116 (2019). doi:10.1073/pnas.1903836116.
- [15] F. Goormaghtigh, L. V. Melderer, Single-cell imaging and characterization of *Escherichia coli* persister cells to ofloxacin in exponential cultures, *Science Advances* 5 (2019).
- [16] F. Goormaghtigh, N. Fraikin, M. Putrins, T. Hallaert, V. Hauyrluik, A. Garcia-Pino, A. Sjödin, S. Kasvandik, K. Udekwi, T. Tenson, N. Kaldalu, L. Van Melderer, Reassessing the Role of Type II Toxin-Antitoxin Systems in Formation of *Escherichia coli* Type II Persister Cells, *mBio* 9 (2018) 1–14.
- [17] S. Helaine, A. M. Cheverton, K. G. Watson, L. M. Faure, S. A. Matthews, D. W. Holden, Internalization of salmonella by macrophages induces formation of nonreplicating persisters, *Science* 343 (2014) 204–208. doi:10.1126/science.1244705.
- [18] A. Harms, E. Maisonneuve, K. Gerdes, Mechanisms of bacterial persistence during stress and antibiotic exposure, *Science* 354 (2016). doi:10.1126/science.aaf4268.
- [19] E. A. Zalis, A. S. Nuxoll, S. Manuse, G. Clair, L. C. Radlinski, B. P. Conlon, J. Adkins, K. Lewis, Stochastic Variation in Expression of the Tricarboxylic Acid Cycle Produces Persister Cells, *mBio* 10 (2019) 1–10.
- [20] Y. Shan, A. B. Gandt, S. E. Rowe, J. P. Deisinger, B. P. Conlon, K. Lewis, crossm *Escherichia coli* 8 (2017) 1–14. doi:10.1128/mBio.02267-16.
- [21] M. S. Svenningsen, A. Veress, A. Harms, N. Mitarai, S. Semsey, Birth and Resuscitation of (p) ppGpp Induced Antibiotic Tolerant Persister Cells, *Scientific Reports* 9 (2019). doi:10.1038/s41598-019-42403-7.
- [22] R. Yamasaki, S. Song, M. Benedik, T. Wood, Persister Cells Resuscitate Using Membrane Sensors that Activate Chemotaxis, Lower cAMP Levels, and Revive Ribosomes, *SSRN Electronic Journal* 23 (2019) 100792. URL: <https://doi.org/10.1016/j.isci.2019.100792>. doi:10.2139/ssrn.3399578.
- [23] R. C. Molina-Quiroz, C. Silva-Valanzuela, J. Brewster, E. Castro-Nallar, S. B. Levy, A. Camilli, Cyclic AMP Regulates Bacterial Persistence through Repression of the Oxidative Stress Response and SOS-Dependent DNA Repair in Uropathogenic *Escherichia coli*, *mBio* 9 (2018) e02144–17. doi:10.1128/mBio.02144-17.
- [24] T. Nyström, Stationary-Phase Physiology, *Annual Review of Microbiology* 58 (2004) 161–181. doi:10.1146/annurev.micro.58.030603.123818.
- [25] S. B. Korch, T. A. Henderson, T. M. Hill, Characterization of the hipA7 allele of *Escherichia coli* and evidence that high persistence is governed by (p)ppGpp synthesis, *Molecular Microbiology* 50 (2003) 1199–1213. doi:10.1046/j.1365-2958.2003.03779.x.
- [26] J. L. Radzikowski, H. Schramke, M. Heinemann, Bacterial persistence from a system-level perspective, *Current Opinion in Biotechnology* 46 (2017) 98–105. URL: <http://dx.doi.org/10.1016/j.copbio.2017.02.012>. doi:10.1016/j.copbio.2017.02.012.
- [27] S. Hui, J. M. Silverman, S. S. Chen, D. W. Erickson, M. Basan, J. Wang, T. Hwa, J. R. Williamson, Quantitative proteomic analysis reveals a simple strategy of global resource allocation in bacteria, *Molecular Systems Biology* 11 (2015) e784–e784. doi:10.15252/msb.20145697.
- [28] J. Ryals, R. Little, H. Bremer, Control of rRNA and tRNA syntheses in *Escherichia coli* by guanosine tetraphosphate, *Journal of Bacteriology* 151 (1982) 1261–1268. doi:10.1128/jb.151.3.1261-1268.1982.
- [29] R. A. Lazzarini, M. Cashel, J. Gallant, On the regulation of guanosine tetraphosphate levels in stringent and relaxed strains of *Escherichia coli*., *Journal of Biological Chemistry* 246 (1971) 4381–4385.
- [30] D. R. Brown, Nitrogen starvation induces persister cell formation in *Escherichia coli*, *Journal of Bacteriology* 201 (2019). doi:10.1128/JB.00622-18.
- [31] E. Rotem, A. Loinger, I. Ronin, I. Levin-Reisman, C. Gabay, N. Shores, O. Biham, N. Q. Balaban, Regulation of phenotypic variability by a threshold-based mechanism underlies bacterial persistence, *Proceedings of the National Academy of Sciences of the United States of America* 107 (2010) 12541–12546. doi:10.1073/pnas.1004333107.
- [32] J. E. Michiels, B. Van den Bergh, N. Verstraeten, J. Michiels, Molecular mechanisms and clinical implications of bacterial persistence, *Drug Resistance Updates* 29 (2016) 76–89. doi:10.1016/j.drug.2016.10.002.
- [33] M. S. Svenningsen, S. Semsey, N. Mitarai, Gene Expression Changes with Minor Effects on the Population Average Have Major Effects on the Occurrence of Cells with Extreme Protein Concentrations, *mSphere* 4 (2019) 1–6. doi:10.1128/msphere.00575-18.
- [34] T. Dörr, M. Vulic, K. Lewis, Ciprofloxacin Causes Persister Formation by Inducing the TisB toxin in *Escherichia coli* 8 (2010) 29–35. doi:10.1371/journal.pbio.1000317.
- [35] B. Gummeson, S. A. Shah, A. S. Borum, M. Fessler, N. Mitarai, M. A. Sørensen, S. L. Svenningsen, Valine-Induced Isoleucine Starvation in *Escherichia coli* K-12 Studied by Spike-In Normalized RNA Sequencing, *Frontiers in Genetics* 11 (2020). doi:10.3389/fgene.2020.00144.
- [36] H. Xiao, M. Kalman, K. Ikehara, S. Zemel, G. Glaser, M. Cashel, Residual guanosine 3',5'-bispyrophosphate synthetic activity of relA null mutants can be eliminated by spoT



- 648 null mutations, *Journal of Biological Chemistry* 266 (1991)  
649 5980–5990.
- 650 [37] F. C. Neidhardt, P. L. Bloch, D. F. Smith, Culture medium for  
651 enterobacteria, *Journal of Bacteriology* 119 (1974) 736–747.  
652 doi:10.1128/jb.119.3.736-747.1974.
- 653 [38] R. J. Barlow, *STATISTICS: A GUIDE AND REFERENCE TO*  
654 *THE USE OF STATISTICAL METHODS IN THE PHYSICAL*  
655 *SCIENCES*, Wiley, 1993.
- 656 [39] F. James, M. Roos, Minuit – A System for Function Mini-  
657 mization and Analysis of the Parameter Errors and Correlations,  
658 *Computer Physics Communications* 10 (1975) 343–367.
- 659 [40] iminuit – A Python interface to Minuit, 2020.
- 660 [41] M. A. Sørensen, K. F. Jensen, S. Pedersen, High concentrations  
661 of ppGpp decrease the RNA chain growth rate. Implications for  
662 protein synthesis and translational fidelity during amino acid  
663 starvation in *Escherichia coli*, *Journal of Molecular Biology*  
664 236 (1994) 441–454. doi:10.1006/jmbi.1994.1156.
- 665 [42] A. K. Sinha, K. S. Winther, The RelA hydrolase do-  
666 main acts as a molecular switch for (p)ppGpp synthe-  
667 sis, *Communications Biology* 4 (2021) 1–10. URL:  
668 <http://dx.doi.org/10.1038/s42003-021-01963-z>.  
669 doi:10.1038/s42003-021-01963-z.
- 670 [43] C. Tian, M. Roghanian, M. G. Jørgensen, K. Sneppen, M. A.  
671 Sørensen, K. Gerdes, N. Mitarai, Rapid curtailing of the  
672 stringent response by toxin-antitoxin module-encoded mR-  
673 Nases, *Journal of Bacteriology* 198 (2016) 1918–1926.  
674 doi:10.1128/JB.00062-16.
- 675 [44] E. Sarubbi, K. E. Rudd, H. Xiao, K. Ikehara, M. Kalman,  
676 M. Cashel, Characterization of the spoT gene of *Escherichia*  
677 *coli*, *Journal of Biological Chemistry* 264 (1989) 15074–15082.  
678 doi:10.1016/s0021-9258(18)63813-x.
